# Supplementary material for: SeqMule: automated pipeline for analysis of human exome/genome sequencing data
Source: PubMed Central journal article supplement (PMC4585643; doi:10.1038/srep14283), 2015-09-18

# **SeqMule: automated pipeline for analysis of human exome/genome sequencing data**

Yunfei Guo<sup>1,2</sup>, Xiaolei Ding<sup>3</sup>, Yufeng Shen<sup>4</sup>, Gholson J. Lyon<sup>5,6</sup>, Kai Wang<sup>1,2,6,7,\*</sup>

<sup>1</sup>Zilkha Neurogenetic Institute, University of Southern California, Los Angeles, CA 90033, USA

<sup>2</sup>Department of Preventive Medicine, Keck School of Medicine, University of Southern California, Los Angeles, CA 90032, USA

<sup>3</sup>School of Forestry and Environment, Nanjing Forestry University, Nanjing, Jiangsu 210037, China

<sup>4</sup>Departments of Systems Biology and Biomedical Informatics, Columbia University, New York, NY 10032, USA

<sup>5</sup>Stanley Institute for Cognitive Genomics, Cold Spring Harbor Laboratory, New York, NY 11797, USA

<sup>6</sup>Utah Foundation for Biomedical Research, 150 S 100 W, Provo, UT, 84601, USA

<sup>7</sup>Department of Psychiatry & Behavioral Sciences, Keck School of Medicine, University of Southern California, Los Angeles, CA 90033, USA

\* To whom correspondence should be addressed. Tel: +1 (323) 442-3917; Fax: +1 (323) 442-2145; Email: [kaiwang@usc.edu](mailto:kaiwang@usc.edu)

## Supplementary information

Table S1. Variant calling time consumption and max bin size in quick mode. Sample NA12878 from 1000 Genomes Project was used to benchmark variant calling time with different max bin sizes in quick mode. Variants were called by SAMtools with 12 concurrent processes. K stands for thousand, M for million. Row minimums are highlighted by bold face. The statistics was calculated based on running time of all child processes. The result shows that the smaller the max bin size is, the smaller the standard deviation is, and that maximum running time does not increase linearly as max bin size grows. The shortest maximum running time is obtained when max bin size is 1 Mbp.

| Max Bin Size (bp)          | 500K       | 1M           | 5M           | 10M   | 20M   |
|----------------------------|------------|--------------|--------------|-------|-------|
| Average running time (min) | 209.2      | <b>191.4</b> | 191.5        | 210.0 | 209.6 |
| Minimum running time (min) | 207.7      | 188.0        | <b>180.5</b> | 189.6 | 188.6 |
| Maximum running time (min) | 211.4      | <b>194.9</b> | 199.4        | 233.1 | 253.0 |
| Standard Deviation         | <b>1.3</b> | 1.8          | 5.4          | 12.3  | 16.5  |

Table S2. Mendelian error rate comparison for variant calling methods. Allele drop in (ADI) means that an offspring presents an allele that does not appear in either parent. Allele drop out (ADO) means that an offspring misses an allele that should have been inherited from the parents.

|                        | Number of calls shared by the family trio | Number of allele drop in | Number of allele drop out | Total number of Mendelian errors | Proportion of Mendelian errors |
|------------------------|-------------------------------------------|--------------------------|---------------------------|----------------------------------|--------------------------------|
| GATK HaplotypeCaller   | 44559                                     | 215                      | 579                       | 794                              | 1.78%                          |
| SAMtools               | 48586                                     | 769                      | 631                       | 1400                             | 2.88%                          |
| FreeBayes              | 52609                                     | 797                      | 321                       | 1118                             | 2.13%                          |
| VarScan                | 41102                                     | 360                      | 542                       | 902                              | 2.19%                          |
| Consensus (2 out of 4) | 49741                                     | 730                      | 796                       | 1526                             | 3.07%                          |
| Consensus (3 out of 4) | 45748                                     | 228                      | 603                       | 831                              | 1.82%                          |
| Consensus (4 out of 4) | 35690                                     | 6                        | 230                       | 236                              | 0.66%                          |

Table S3. Mendelian error rate comparison for variant calling methods (MAF<1%). Allele drop in (ADI) means that an offspring presents an allele that does not appear in either parent. Allele drop out (ADO) means that an offspring misses an allele that should have been inherited from the parents.

|                        | Number of calls shared by the family trio | Number of allele drop in | Number of allele drop out | Total number of Mendelian errors | Proportion of Mendelian errors |
|------------------------|-------------------------------------------|--------------------------|---------------------------|----------------------------------|--------------------------------|
| GATK HaplotypeCaller   | 5831                                      | 46                       | 51                        | 97                               | 1.66%                          |
| SAMtools               | 9155                                      | 471                      | 122                       | 593                              | 6.48%                          |
| FreeBayes              | 13426                                     | 644                      | 34                        | 678                              | 5.05%                          |
| VarScan                | 6428                                      | 228                      | 88                        | 316                              | 4.92%                          |
| Consensus (2 out of 4) | 10090                                     | 447                      | 159                       | 606                              | 6.01%                          |
| Consensus (3 out of 4) | 7553                                      | 84                       | 87                        | 171                              | 2.26%                          |
| Consensus (4 out of 4) | 4934                                      | 4                        | 22                        | 26                               | 0.53%                          |

Table S4. Time consumption under different configurations. A human exome data set (138.8 million 90bp-long paired-end reads, 113X coverage in target region) was aligned with BWA-MEM. PCR duplicates were removed by Picardtools. Variants were called by GATK HaplotypeCaller. Quick mode here denotes SeqMule's built-in parallel framework. Built-in parallel capability is always turned on for underlying 3<sup>rd</sup> party algorithms.

| Quick Mode Enabled | CPU (number of cores) | Max Memory Used (G) | Variant Calling Time (min) | Time (min) | Time Saving Compared With Analysis Using 1 CPU |
|--------------------|-----------------------|---------------------|----------------------------|------------|------------------------------------------------|
| No                 | 1                     | 7.03                | 217.5                      | 910        | 0.00%                                          |
| No                 | 2                     | 8.17                | 208.4                      | 695        | 23.63%                                         |
| No                 | 4                     | 11.90               | 189.9                      | 540        | 40.66%                                         |
| No                 | 8                     | 16.27               | 203.6                      | 529        | 41.87%                                         |
| No                 | 12                    | 20.34               | 192.5                      | 474        | 47.91%                                         |
| Yes                | 2                     | 8.17                | 117.8                      | 606        | 33.41%                                         |
| Yes                | 4                     | 14.67               | 51.5                       | 385        | 57.69%                                         |
| Yes                | 8                     | 28.98               | 40.3                       | 346        | 61.98%                                         |
| Yes                | 12                    | 43.29               | 31.1                       | 317        | 65.16%                                         |

Figure S1. Compare individual callers with Genome In a Bottle Gold Standard. Results from 4 individual variant callers, GATK HaplotypeCaller (gatk\_hc), Freebayes, SAMtools and VarScan were uploaded to <http://www.bioplanet.com/gcat> to be compared against gold standard from Genome In a Bottle project (Version 2.18) and Illumina HumanOmni2.5-8v1 SNP array.

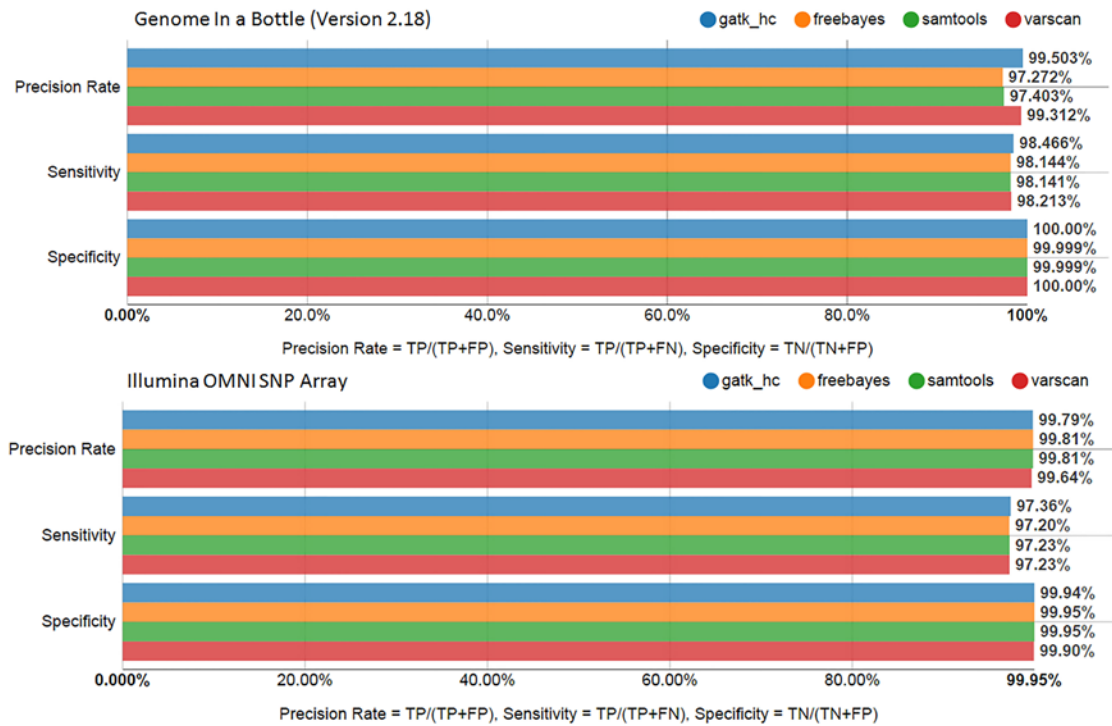

Figure S2. Compare consensus results with Genome In a Bottle Gold Standard. Consensus calls were generated by combining results from individual variant callers in different ways, namely 2-out-of-4, 3-out-of-4 and 4-out-of-4. Then they were uploaded to <http://www.bioplanet.com/gcat> to be compared against gold standard from Genome In a Bottle project (Version 2.18) and Illumina HumanOmni2.5-8v1 SNP array. Result from GATK HaplotypeCaller (GATK-HC) is also shown as a reference.

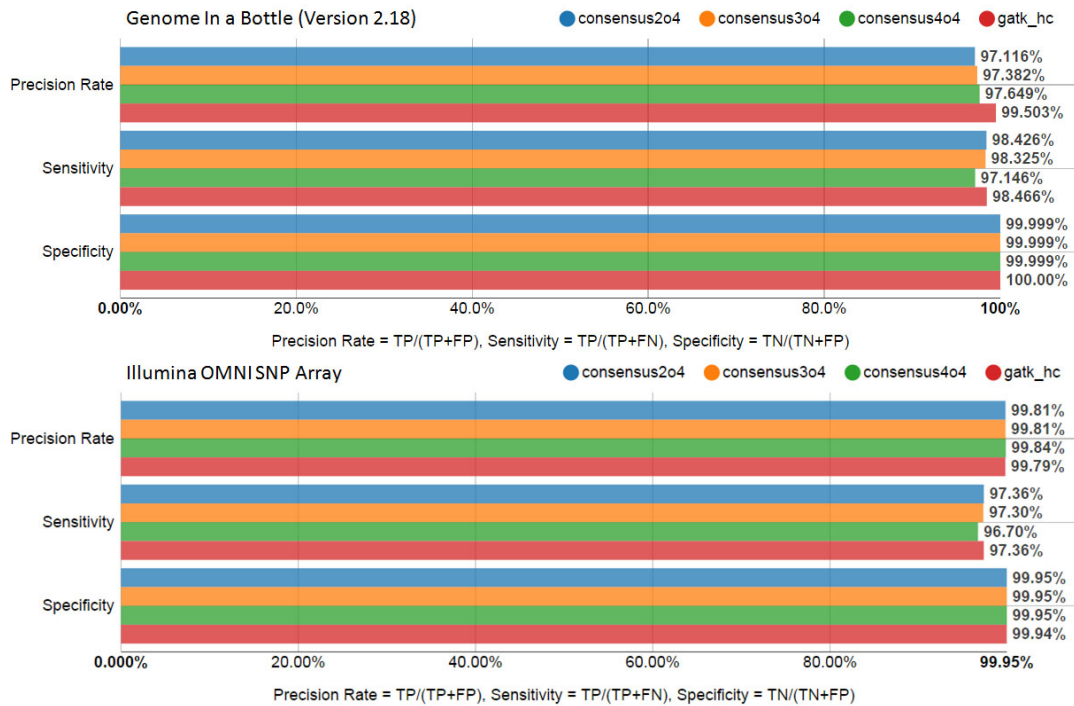

Supplement: srep14283-s1.pdf [file srep14283-s1.pdf]
